# Supplementary material for: Construction of immune-related LncRNAs classifier to predict prognosis and immunotherapy response in thymic epithelial tumors
Source: Oxford University Press journal article supplement (doi:10.1042/bsr20220317), 2022-04-19
Supplement: bsr-2022-0317_supp.pdf [file bsr-2022-0317_supp.pdf]

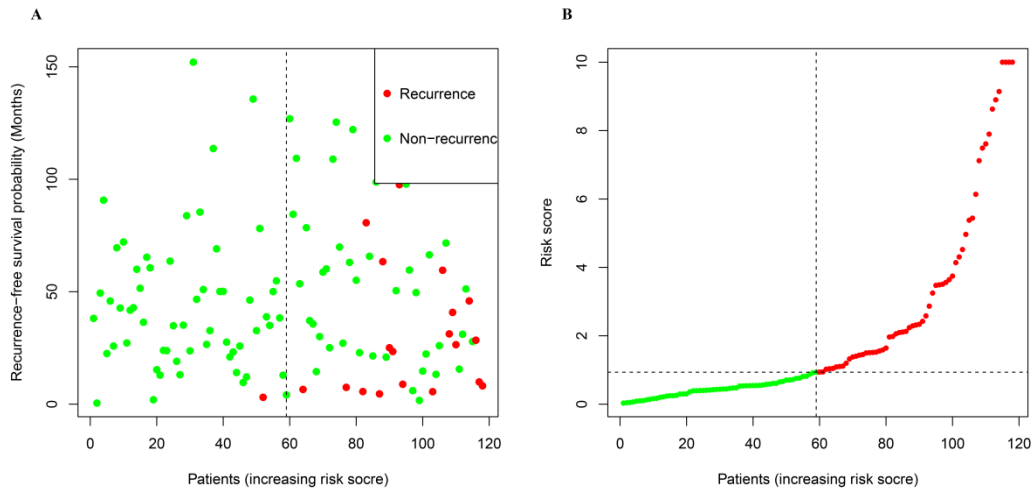

Figure S1. Development of IRL classifier for prediction of prognosis in TETs patients in TCGA database. ( A and B) Distribution of IRL classifier risk score.
